# Supplementary material
Source: publisher figshare collection journal article supplement (https://gsapubs.figshare.com/ndownloader/files/33525218)
Supplement: Supplementary file 1 [file 33525218]

## Sheet: Calcite Samples
Sample ID	Count	Δ47 (‰)	±1 s.e. (Δ47)	T (°C)	±1 s.e. (T (°C))	δ13C (‰, VPDB)	±1 s.e. (δ13C)	δ18O (‰, VPDB)	±1 s.e. (δ18O)	Formation water δ18O (‰, VSMOW)	±1 s.e. (Formation water δ18O)
LLB2	3	0.515	0.01	56	4.6	-11.65	0.03	-11.68	0.02†	-5.4	2.1
LLB6	3	0.541	0.005†	44.7	1.9†	-2.01	0.03†	-9.16	0.02†	-4.8	0.9†
Analytical Notes:
† In cases where the measured replicate error was less than the typical error observed in our carbonate standards, we substitute the standard deviation from our measurements of CAR1 as a conservative estimate of the true error before calculating the standard error.
VPDB = Vienna Pee Dee Belemnite
VSMOW = Vienna Standard Mean Ocean Water, calculated following Watkins et al. (2014).

## Sheet: Standards
		CAR1	TRV1	IAEA-603		note
Δ47 (90°C reaction) (‰)	average	0.305	0.612	0.304		corrected to ETH standards
	±1σ	0.008	0.008	0.01
δ18Ocarb (‰)	average	-4.75	-9.55	-2.35		corrected to ETH standards
	±1σ	0.04	0.08	0.05
δ13Ccarb (‰)	average	4.26	1.07	2.47		corrected to ETH standards
	±1σ	0.05	0.09	0.06
n		34	32	10
		ETH1	ETH2	ETH3	ETH4	note
Δ47 (90°C reaction) (‰)	average	0.195772	0.202627	0.570436	0.437682	all corrections applied except final correction to ETH standards; used to make ETH correction
	±1σ	0.00708503	0.00908744	0.00859566	0.00787662
δ18Ocarb (‰)	average	-2.51077	-18.8773	-2.03533	-19.031	all corrections applied except final correction to ETH standards; used to make ETH correction
	±1σ	0.0341894	0.0665998	0.0429156	0.0847275
δ13Ccarb (‰)	average	2.18036	-9.92536	1.88872	-10.0201	all corrections applied except final correction to ETH standards; used to make ETH correction
	±1σ	0.0484797	0.0983327	0.0870301	0.0606827
n		15	13	15	15

## Sheet: G49439
Hodgin, E.B., et al., 2022, Final inversion of the Midcontinent Rift during the Rigolet Phase of the Grenvillian Orogeny: Geology, https://doi.org/10.1130/G49439.1
